# Supplementary material
Source: publisher figshare collection journal article supplement (https://osapublishing.figshare.com/ndownloader/files/30744031)
Supplement: Supplementary file 1 [file 30744031]

## Analysis of intracellular protein dynamics in living zebrafish embryos using light-sheet fluorescence single-molecule microscopy: supplement

**MATTEO BERNARDELLO,<sup>1,5</sup> RADOSLAW J. GORA,<sup>2,5</sup> PATRICK VAN HAGE,<sup>2</sup>  GUSTAVO CASTRO-OLVERA,<sup>1</sup>  EMILIO J. GUALDA,<sup>1</sup> MARCEL J. M. SCHAAF,<sup>2,3,6</sup> AND PABLO LOZA-ALVAREZ<sup>1,4,6</sup> **

<sup>1</sup>*ICFO-Institut de Ciències Fotoniques, The Barcelona Institute of Science and Technology, Castelldefels, 08860, Spain*

<sup>2</sup>*Institute of Biology, Leiden University, Leiden, The Netherlands*

<sup>3</sup>*m.j.m.schaaf@biology.leidenuniv.nl*

<sup>4</sup>*pablo.loza@icfo.eu*

<sup>5</sup>*Equal contribution*

<sup>6</sup>*Equal contribution*

---

This supplement published with The Optical Society on 13 September 2021 by The Authors under the terms of the [Creative Commons Attribution 4.0 License](https://creativecommons.org/licenses/by/4.0/) in the format provided by the authors and unedited. Further distribution of this work must maintain attribution to the author(s) and the published article's title, journal citation, and DOI.

Supplement DOI: <https://doi.org/10.6084/m9.figshare.16444320>

Parent Article DOI: <https://doi.org/10.1364/BOE.435103>

# 1 Analysis of Intracellular Protein Dynamics in 2 Living Zebrafish Embryos Using Light-Sheet 3 Fluorescence Single-Molecule Microscopy: 4 supplemental document

## 6 Supplement 1

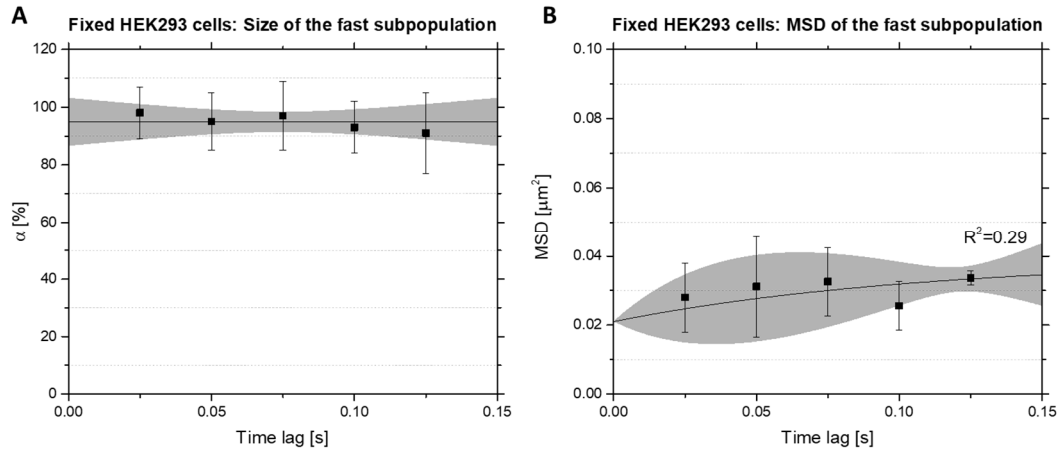

Fig. S1: Analysis of the mobility pattern of YFP-GR in fixed HEK293 cells. (A) Fast subpopulation fraction size fitted to a linear model with a fixed slope. Since  $94.8 \pm 1.3\%$  of all the YFP-GR belong to one, fast-diffusing population, impact of the slow-diffusing fraction can in this case be neglected. (B) MSD values for the fast subpopulation, fitted using a confined diffusion model. The offset value of the measurement is  $0.023 \mu\text{m}^2 \text{s}^{-1}$ , and equals to  $4 \cdot (dx)^2$ , with the  $(dx)$  equaling 76 nm. The MSDs of this population are so close to the offset that the molecules can be considered immobile. In both graphs, the 95% confidence interval, standard deviation, and Pearson's correlation coefficients  $R^2$  of the model fitness are shown.

**Table S1: Results of the analysis of the mobility pattern of YFP-GR in fixed HEK293 cells**

| Parameter                                                  | Fixed HEK293 cells |
|------------------------------------------------------------|--------------------|
| $\alpha$ [%]                                               | $94.8 \pm 1.3$     |
| $D_0$ fast subpopulation [ $\mu\text{m}^2 \text{s}^{-1}$ ] | $0.041 \pm 0.038$  |
| $L$ fast subpopulation [nm]                                | $233 \pm 151$      |

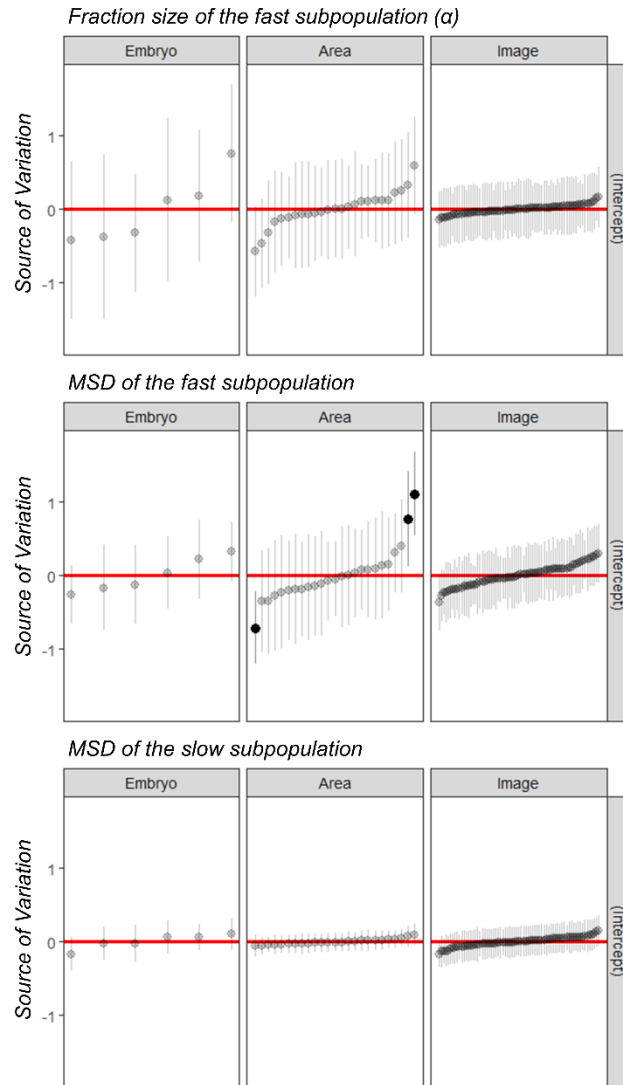

17  
18 Fig. S2: Results of the mixed linear model analysis reveal potential sources of the data variability. To establish effect  
19 ranges, data were logit-transformed and presented on a logit scale. Caterpillar plots present the effect from random  
20 components as the deviation of the group intercepts from the global mean of the data. The effect range represents the  
21 deviation between different embryos, different areas within an embryo, and different images of the same area within  
22 an embryo, that are parts of the total measurement error in the mobile fraction size,  $\alpha$  (A), MSD of the mobile fraction  
23 (B), and MSD of the immobile fraction (C). Red lines indicate the global mean of the data, while black dots signify  
24 significant deviations from the global mean among embryos, areas, and images. The data points are sorted from the  
25 ones most negatively deviating from the global average to the ones that deviate most positively.

26  
27  
28  
29

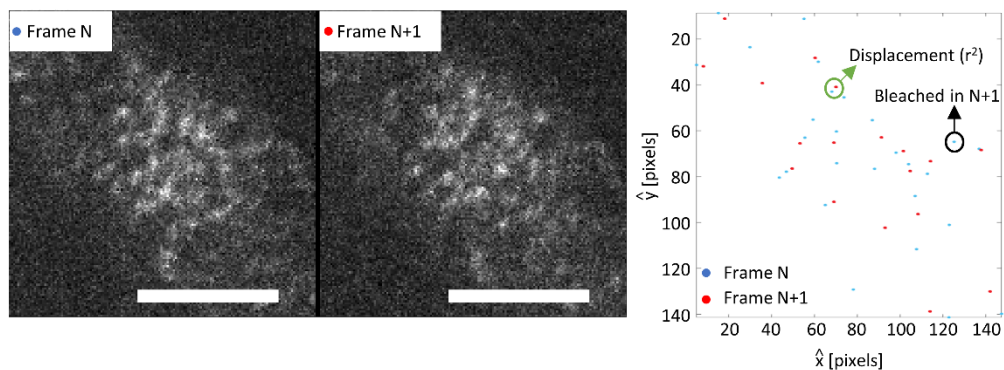

30  
 31 Fig. S3: Representative image of a displacement analysis based on a single image pair (Frames N and N+1). Not every  
 32 molecule is positionally correlated due to the photobleaching. The average number of peaks per image here equals 23.0.  
 33 This image pair is a part of a 3000-image movie. For the entire movie, the total number of displacements found in the  
 34 2999 image pairs equals to 35467.
